# Supplementary material for: Assessing Bacterial Populations in the Lung by Replicate Analysis of Samples from the Upper and Lower Respiratory Tracts
Source: PLOS journal article supplement (doi:10.1371/journal.pone.0042786), 2012-09-06

Figure S3

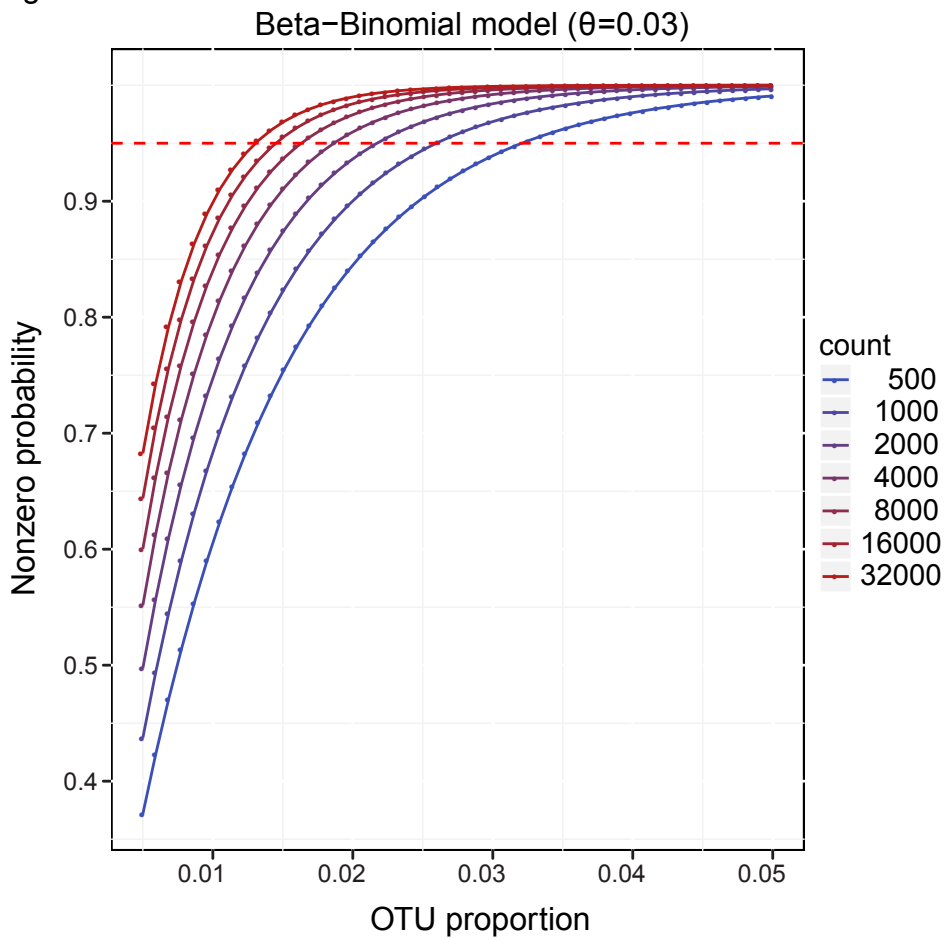

Supplement: S3 (10.1371/journal.pone.0042786.s003) [file journal.pone.0042786.s003]
